# Supplementary material for: Impact of Statin Use on Localized Prostate Cancer Outcomes after Radiation Therapy: Long-Term Follow-Up
Source: MDPI journal article supplement (doi:10.3390/cancers14153606), 2022-07-24
Supplement: s1 [file s1]

## Supplementary Data

**Supplementary Table S1:** Characteristics of D'Amico Low-risk EBRT-treated patients according to statin use. All values are median (IQR) or frequencies (%).

|                           | N   | Overall,<br>N = 254 | No Statin,<br>N = 163 (64%) | Statin Intake,<br>N = 91 (36%) | p-value |
|---------------------------|-----|---------------------|-----------------------------|--------------------------------|---------|
| <b>Age (years)</b>        | 253 | 68.0 (64.0, 72.0)   | 68.0 (63.0, 72.0)           | 69.0 (65.0, 72.8)              | 0.090   |
| <b>Follow-up (months)</b> | 239 | 90 (56, 111)        | 84 (48, 108)                | 96 (64, 114)                   | 0.2     |
| <b>PSA (ng/mL)</b>        | 254 |                     |                             |                                | >0.9    |
| 0-10                      |     | 254 (100%)          | 163 (100%)                  | 91 (100%)                      |         |
| 10-20                     |     | 0 (0%)              | 0 (0%)                      | 0 (0%)                         |         |
| >20                       |     | 0 (0%)              | 0 (0%)                      | 0 (0%)                         |         |
| <b>Gleason Score</b>      | 254 |                     |                             |                                | >0.9    |
| 6                         |     | 254 (100%)          | 163 (100%)                  | 91 (100%)                      |         |
| <b>Clinical T-Stage</b>   | 254 |                     |                             |                                | 0.3     |
| cT1                       |     | 182 (72%)           | 113 (69%)                   | 69 (76%)                       |         |
| cT2a                      |     | 72 (28%)            | 50 (31%)                    | 22 (24%)                       |         |
| <b>ADT</b>                | 254 |                     |                             |                                |         |
| No                        |     | 254 (100%)          | 163 (100%)                  | 91 (100%)                      |         |

Abbreviations: PSA=Prostate-specific antigen; ADT=Androgen deprivation therapy

**Supplementary Table S2.** Characteristics of D'Amico intermediate-risk EBRT-treated patients according to statin use; All values are median (IQR) or frequencies (%).

|                          | N   | Overall,<br>N = 645 | No Statin,<br>N = 336 (52%) | Statin Intake,<br>N = 309 (48%) | p-value |
|--------------------------|-----|---------------------|-----------------------------|---------------------------------|---------|
| <b>Age (years)</b>       | 643 | 71.0 (66.0, 74.0)   | 71.0 (65.0, 74.0)           | 71.0 (66.0, 74.0)               | 0.4     |
| <b>Follow-up (month)</b> | 629 | 60 (30, 96)         | 59 (30, 91)                 | 66 (36, 96)                     | 0.2     |
| <b>PSA (ng/mL)</b>       | 645 |                     |                             |                                 | 0.001   |
| 0-10                     |     | 448 (69%)           | 214 (64%)                   | 234 (76%)                       |         |
| 10-20                    |     | 197 (31%)           | 122 (36%)                   | 75 (24%)                        |         |
| >20                      |     | 0 (0%)              | 0 (0%)                      | 0 (0%)                          |         |
| <b>Gleason Score</b>     | 631 |                     |                             |                                 | 0.11    |
| 6                        |     | 80 (13%)            | 48 (15%)                    | 32 (10%)                        |         |
| 7                        |     | 551 (87%)           | 278 (85%)                   | 273 (90%)                       |         |
| <b>Clinical T-stage</b>  | 641 |                     |                             |                                 | 0.3     |
| cT1                      |     | 392 (61%)           | 205 (61%)                   | 187 (61%)                       |         |
| cT2a                     |     | 188 (29%)           | 103 (31%)                   | 85 (28%)                        |         |
| cT2b                     |     | 61 (9.5%)           | 26 (7.8%)                   | 35 (11%)                        |         |
| <b>ADT</b>               | 645 |                     |                             |                                 | 0.15    |
| No                       |     | 550 (85%)           | 280 (83%)                   | 270 (87%)                       |         |
| Yes                      |     | 95 (15%)            | 56 (17%)                    | 39 (13%)                        |         |

Abbreviations: PSA=Prostate-specific antigen; ADT=Androgen deprivation therapy; EBRT=External beam radiation therapy

Supplementary Table S3: Characteristics of D'Amico high-risk EBRT-treated patients according to statin use; All values are median (IQR) or frequencies (%).

|                           | N   | Overall,<br>N = 302 | No Statin,<br>N = 180 (60%) | Statin Intake,<br>N = 122 (40%) | p-value |
|---------------------------|-----|---------------------|-----------------------------|---------------------------------|---------|
| <b>Age (years)</b>        | 298 | 71 (66, 75)         | 71 (66, 75)                 | 72 (66, 74)                     | 0.8     |
| <b>Follow-up (months)</b> | 285 | 60 (36, 91)         | 60 (36, 90)                 | 60 (34, 108)                    | 0.8     |
| <b>PSA (ng/mL)</b>        | 301 |                     |                             |                                 | 0.008   |
| 0-10                      |     | 116 (39%)           | 59 (33%)                    | 57 (47%)                        |         |
| 10-20                     |     | 67 (22%)            | 38 (21%)                    | 29 (24%)                        |         |
| >20                       |     | 118 (39%)           | 83 (46%)                    | 35 (29%)                        |         |
| <b>Clinical T-stage</b>   | 302 |                     |                             |                                 | 0.12    |
| cT1                       |     | 78 (26%)            | 45 (25%)                    | 33 (27%)                        |         |
| cT2a                      |     | 54 (18%)            | 38 (21%)                    | 16 (13%)                        |         |
| cT2b                      |     | 26 (8.6%)           | 18 (10%)                    | 8 (6.6%)                        |         |
| cT2c                      |     | 25 (8.3%)           | 17 (9.4%)                   | 8 (6.6%)                        |         |
| cT3-4                     |     | 119 (39%)           | 62 (34%)                    | 57 (47%)                        |         |
| <b>Gleason Score</b>      | 299 |                     |                             |                                 | 0.5     |
| 6                         |     | 38 (13%)            | 24 (13%)                    | 14 (12%)                        |         |
| 7                         |     | 85 (28%)            | 55 (31%)                    | 30 (25%)                        |         |
| 8                         |     | 112 (37%)           | 65 (37%)                    | 47 (39%)                        |         |
| 9                         |     | 60 (20%)            | 33 (19%)                    | 27 (22%)                        |         |
| 10                        |     | 4 (1.3%)            | 1 (0.6%)                    | 3 (2.5%)                        |         |
| <b>ADT</b>                | 302 |                     |                             |                                 | 0.2     |
| No                        |     | 36 (12%)            | 25 (14%)                    | 11 (9.0%)                       |         |
| Yes                       |     | 266 (88%)           | 155 (86%)                   | 111 (91%)                       |         |

Abbreviations: PSA=Prostate-specific antigen; ADT=Androgen deprivation therapy; EBRT=External beam radiation therapy

**Supplementary Table S4.** Characteristics of D'Amico low-risk LDR-treated patients according to statin use; All values are median (IQR) or frequencies (%).

|                           | N   | Overall,<br>N = 885 | No Statin,<br>N = 506 (57%) | Statin Intake,<br>N = 379 (43%) | p-value |
|---------------------------|-----|---------------------|-----------------------------|---------------------------------|---------|
| <b>Age (years)</b>        | 885 | 64 (59, 68)         | 63 (58, 68)                 | 66 (61, 69)                     | <0.001  |
| <b>Follow-up (months)</b> | 835 | 56 (30, 90)         | 56 (30, 90)                 | 52 (30, 86)                     | 0.5     |
| <b>PSA (ng/mL)</b>        | 885 |                     |                             |                                 | >0.9    |
| 0-10                      |     | 885 (100%)          | 506 (100%)                  | 379 (100%)                      |         |
| 10-20                     |     | 0 (0%)              | 0 (0%)                      | 0 (0%)                          |         |
| >20                       |     | 0 (0%)              | 0 (0%)                      | 0 (0%)                          |         |
| <b>Clinical T-stage</b>   | 885 |                     |                             |                                 | 0.090   |
| cT1                       |     | 674 (76%)           | 396 (78%)                   | 278 (73%)                       |         |
| cT2a                      |     | 211 (24%)           | 110 (22%)                   | 101 (27%)                       |         |
| <b>Gleason Score</b>      | 885 |                     |                             |                                 | >0.9    |
| 6                         |     | 885 (100%)          | 506 (100%)                  | 379 (100%)                      |         |
| <b>ADT</b>                | 885 |                     |                             |                                 | >0.9    |
| No                        |     | 882 (100%)          | 504 (100%)                  | 378 (100%)                      |         |
| Yes                       |     | 3 (0.3%)            | 2 (0.4%)                    | 1 (0.3%)                        |         |

Abbreviations: PSA=Prostate-specific antigen; ADT=Androgen deprivation therapy; LDR=Low-dose rate seed brachytherapy

**Supplementary Table S5.** Characteristics of D'Amico intermediate-risk LDR-treated patients according to statin use; All values are median (IQR) or frequencies (%).

|                           | N   | Overall,<br>N = 779 | No Statin,<br>N = 423 (54%) | Statin Intake,<br>N = 356 (46%) | p-value |
|---------------------------|-----|---------------------|-----------------------------|---------------------------------|---------|
| <b>Age (years)</b>        | 777 | 66 (62, 70)         | 65 (60, 70)                 | 67 (63, 71)                     | <0.001  |
| <b>Follow-up (months)</b> | 705 | 48 (24, 72)         | 44 (22, 72)                 | 48 (24, 72)                     | 0.4     |
| <b>PSA (ng/mL)</b>        | 779 |                     |                             |                                 | 0.11    |
| 0-10                      |     | 662 (85%)           | 351 (83%)                   | 311 (87%)                       |         |
| 10-20                     |     | 117 (15%)           | 72 (17%)                    | 45 (13%)                        |         |
| >20                       |     | 0 (0%)              | 0 (0%)                      | 0 (0%)                          |         |
| <b>Clinical T-stage</b>   | 775 |                     |                             |                                 | 0.5     |
| cT1                       |     | 577 (74%)           | 320 (76%)                   | 257 (72%)                       |         |
| cT2a                      |     | 158 (20%)           | 80 (19%)                    | 78 (22%)                        |         |
| cT2b                      |     | 40 (5.2%)           | 20 (4.8%)                   | 20 (5.6%)                       |         |
| <b>Gleason Score</b>      | 768 |                     |                             |                                 | 0.8     |
| 6                         |     | 121 (16%)           | 67 (16%)                    | 54 (15%)                        |         |
| 7                         |     | 647 (84%)           | 350 (84%)                   | 297 (85%)                       |         |
| <b>ADT</b>                | 779 |                     |                             |                                 | 0.3     |
| No                        |     | 772 (99%)           | 421 (100%)                  | 351 (99%)                       |         |
| Yes                       |     | 7 (0.9%)            | 2 (0.5%)                    | 5 (1.4%)                        |         |

Abbreviations: PSA=Prostate-specific antigen; ADT=Androgen deprivation therapy;  
LDR=Low-dose rate seed brachytherapy

Supplementary Table S6. Characteristics of patients treated by EBRT+HDR according to statin use; All values are median (IQR) or frequencies (%).

|                               | N   | Overall,<br>N = 599 | No Statin,<br>N = 333 (56%) | Statin Intake,<br>N = 266 (44%) | p-value |
|-------------------------------|-----|---------------------|-----------------------------|---------------------------------|---------|
| <b>Age (years)</b>            | 596 | 67 (62, 71)         | 66 (61, 70)                 | 68 (64, 72)                     | <0.001  |
| <b>Follow-up (months)</b>     | 539 | 36 (18, 52)         | 36 (18, 54)                 | 36 (22, 52)                     | 0.7     |
| <b>PSA (ng/mL)</b>            | 599 |                     |                             |                                 | 0.010   |
| 0-10                          |     | 372 (62%)           | 191 (57%)                   | 181 (68%)                       |         |
| 10-20                         |     | 166 (28%)           | 99 (30%)                    | 67 (25%)                        |         |
| >20                           |     | 61 (10%)            | 43 (13%)                    | 18 (6.8%)                       |         |
| <b>Gleason Score</b>          | 598 |                     |                             |                                 | 0.6     |
| 6                             |     | 29 (4.8%)           | 13 (3.9%)                   | 16 (6.0%)                       |         |
| 7                             |     | 454 (76%)           | 252 (76%)                   | 202 (76%)                       |         |
| 8                             |     | 84 (14%)            | 48 (14%)                    | 36 (14%)                        |         |
| 9                             |     | 28 (4.7%)           | 18 (5.4%)                   | 10 (3.8%)                       |         |
| 10                            |     | 3 (0.5%)            | 1 (0.3%)                    | 2 (0.8%)                        |         |
| <b>Clinical T-stage</b>       | 598 |                     |                             |                                 | 0.002   |
| cT1                           |     | 282 (47%)           | 162 (49%)                   | 120 (45%)                       |         |
| cT2a                          |     | 189 (32%)           | 88 (27%)                    | 101 (38%)                       |         |
| cT2b                          |     | 49 (8.2%)           | 25 (7.5%)                   | 24 (9.0%)                       |         |
| cT2c                          |     | 21 (3.5%)           | 16 (4.8%)                   | 5 (1.9%)                        |         |
| cT3-4                         |     | 57 (9.5%)           | 41 (12%)                    | 16 (6.0%)                       |         |
| <b>D'Amico Classification</b> | 599 |                     |                             |                                 | 0.055   |
| Low risk                      |     | 9 (1.5%)            | 4 (1.2%)                    | 5 (1.9%)                        |         |
| Intermediate risk             |     | 408 (68%)           | 215 (65%)                   | 193 (73%)                       |         |
| High risk                     |     | 182 (30%)           | 114 (34%)                   | 68 (26%)                        |         |
| <b>ADT</b>                    | 599 |                     |                             |                                 | 0.7     |
| No                            |     | 420 (70%)           | 231 (69%)                   | 189 (71%)                       |         |
| Yes                           |     | 179 (30%)           | 102 (31%)                   | 77 (29%)                        |         |

Abbreviations: PSA=Prostate-specific antigen; ADT=Androgen deprivation therapy; EBRT=External beam radiation therapy.
